# Supplementary material for: Phase transition kinetics in Langmuir and spin-coated polydiacetylene films
Source: Royal Society of Chemistry journal article supplement (doi:10.1039/b915527a), 2009-11-19
Supplement: b915527a.pdf [file b915527a.pdf]

Supporting Information for

Phase Transition Kinetics in Langmuir and Spin-Coated  
Polydiacetylene Films

<sup>#</sup>Yevgeniy Lifshitz<sup>[a]</sup>, <sup>#</sup>Alexander Upcher<sup>[a]</sup>, Olga Shusterman<sup>[c]</sup>, Baruch  
Horovitz<sup>[c]</sup>, Amir Berman<sup>[b]</sup> and Yuval Golan<sup>[a]</sup>

[a] Prof. Y. Golan, Y. Lifshitz, A. Upcher

Materials Engineering Department and Ilse Katz Center of Nanoscience

Ben Gurion University of the Negev, Beer-Sheva 84105 (Israel)

Email: [ygolan@bgu.ac.il](mailto:ygolan@bgu.ac.il)

[b] Dr. A. Berman

Department of Biotechnology and Ilse Katz Center of Nanoscience

Ben Gurion University of the Negev, Beer-Sheva 84105 (Israel)

Email: [aberman@bgu.ac.il](mailto:aberman@bgu.ac.il)

[c] Prof. B. Horovitz, O. Shusterman

Department of Physics and Ilse Katz Center of Nanoscience

Ben Gurion University of the Negev, Beer-Sheva 84105 (Israel)

<sup>#</sup> Authors who contributed equally to this work.

**1. AFM images of SC PDA films**

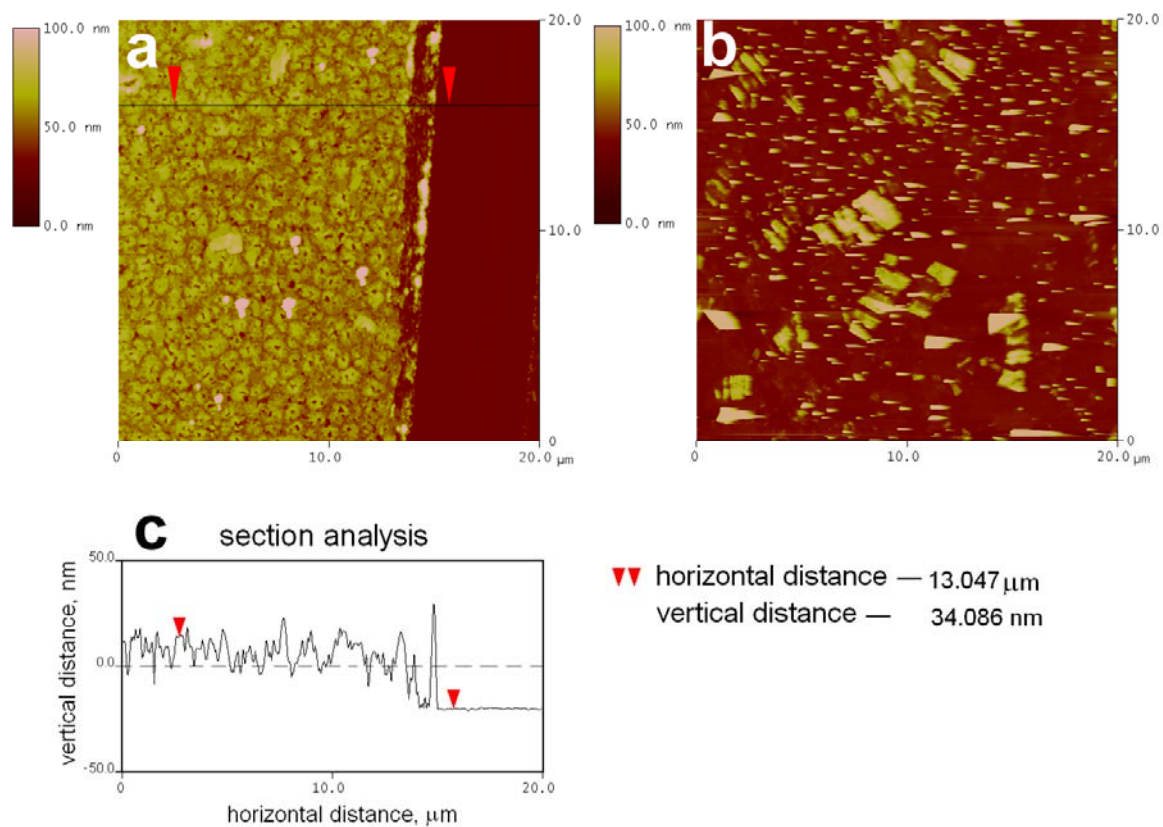

Figure S1: AFM images of SC PDA film (a) before and (b) during the degradation stage; (c) Section analysis along the black line shown in (a). Note the good coverage of the PDA film in (a) with the well-defined step from the film to the quartz substrate while image (b) depicts fragments remaining from the degraded film.

## 2. The kinetic model

### 2.1 Simple Kinetic Model

**M** – Monomer phase (the unpolymerized part of the film)

**P** – Polymer phase (the polymerized part of the film)

**D** – Degradation phase (the part of the film that was damaged and eventually removed from the substrate)

Two exposure-dependent kinetic constants,  $k_1$  and  $k_5$  ( $\text{Wscm}^{-2}$ )<sup>-1</sup>, were defined in order to describe the transformation rate in each stage of the reaction as a function of UV dose. The phase transitions of PDA are schematically presented by Formula (1):

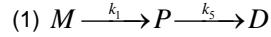

The M→P transition is described by  $k_1$  and the P→D transitions are described by  $k_5$ .

Setting the initial amount of monomer to unity, the fractions of the monomer M, polymer P and degradation stage D as a function of radiation exposure, H, ( $\text{Wscm}^{-2}$ ) can be calculated using Equations (2)-(4):

$$(2) \quad \frac{dM}{dH} = -k_1 M \rightarrow M = M_0 e^{-k_1 H}$$

$$(3) \quad \frac{dP}{dH} = k_1 M - k_5 P \rightarrow P = \frac{k_1}{k_5 - k_1} (e^{-k_1 H} - e^{-k_5 H})$$

$$(4) \quad \frac{dD}{dH} = k_5 P \rightarrow D = 1 + \frac{k_1 e^{-k_5 H} - k_5 e^{-k_1 H}}{k_5 - k_1}$$

### 2.2 Unidirectional Kinetic Model

The following phases are present:

**M** – Monomer phase (the unpolymerized part of the film with starting amount of  $M_0$ )

**B** – Blue phase (the polymerized part of the film in the blue phase)

**R** – Red phase (the polymerized part of the film in the red phase)

**D** – Degradation phase (the part of the film that was damaged)

Three exposure-reciprocal kinetic constants,  $k_1$ ,  $k_2$  and  $k_5$  ( $\text{Wscm}^{-2}$ )<sup>-1</sup>, were defined in order to describe the transformation rate in each stage of the reaction as a function of UV dose. The phase transitions of PDA are schematically presented by:

(5)

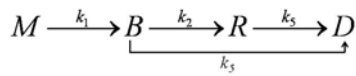

The phases evolve with flux H of UV radiation according to:

$$(6) \quad \frac{dM}{dH} = -k_1 M$$

$$(7) \quad \frac{dB}{dH} = k_1 M - k_2 B - k_5 B$$

$$(8) \quad \frac{dR}{dH} = k_2 B - k_5 R$$

$$(9) \quad \frac{dD}{dH} = k_5 R + k_5 B = k_5 (B + R)$$

The solution for M is

$$(10) \quad M = e^{-k_1 H}$$

with all quantities in units of the starting monomer  $M_0$  proceed by considering the sum  $B+R$  so that

$$(11) \quad \frac{dP}{dH} = \frac{d(B+R)}{dH} = k_1 M - (B+R)k_5$$

$$(12) \quad B+R = \frac{k_1}{k_5 - k_1} (e^{-k_1 H} - e^{-k_5 H})$$

To solve D to place Eq. (12) in to Eq. (9)

$$(13) \quad \frac{dD}{dH} = k_5 R + k_5 B = k_5 (R+B) = k_5 \left[ \frac{k_1}{k_5 - k_1} (e^{-k_1 H} - e^{-k_5 H}) \right]$$

$$(14) \quad D = 1 + \frac{k_1 e^{-k_5 H} - k_5 e^{-k_1 H}}{k_5 - k_1}$$

For B we plot:

$$(15) \quad \frac{dB}{dH} = k_1 M - k_2 B - k_5 B = k_1 M - B(k_2 + k_5)$$

$$(16) \quad B = \frac{k_1}{(k_2 + k_5 - k_1)} (e^{-k_1 H} - e^{-(k_2 + k_5)H})$$

And finally to solve R:

$$(17) \quad \frac{dR}{dH} = k_2 B - k_5 R$$

$$(18) \quad R = \frac{k_1 (k_2 e^{-k_1 H} - (k_2 + k_5 - k_1) e^{-(k_2 + k_5)H} + (k_5 - k_1) e^{-(k_2 - k_5)H})}{(k_2 + k_5 - k_1)(k_5 - k_1)}$$

### 2.3 Reversible Kinetic Model

The following phases are present:

**M** – Monomer phase (the unpolymerized part of the film with starting amount of  $M_0$ )

**B** – Blue phase (the polymerized part of the film in the blue phase)

**I** – Intermediate phase (intermediate phase in the blue to red transition)

**R** – Red phase (the polymerized part of the film in the red phase)

**D** – Degradation phase (the part of the film that was damaged)

Five exposure–reciprocal kinetic constants,  $k_1$ – $k_5$  ( $\text{Wscm}^{-2}$ )<sup>-1</sup>, were defined in order to describe the transformation rate in each stage of the reaction as a function of UV dose. The phase transitions of PDA are schematically presented by:

(19)

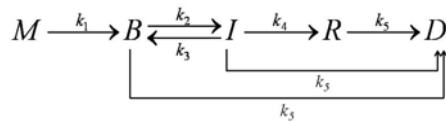

We derive here the solution for the kinetic equations, including the putative new phase I. The M equation is solved by  $M = e^{-k_1 H}$  (normalizing the initial monomer to unity), hence the B and I equations can be written in a matrix form as

$$(20) \quad \frac{d}{dH} \begin{pmatrix} B \\ I \end{pmatrix} = \begin{pmatrix} k_1 e^{-k_1 H} \\ 0 \end{pmatrix} - \hat{F} \begin{pmatrix} B \\ I \end{pmatrix}$$

where

$$(21) \quad \hat{F} = \begin{pmatrix} k_2 + k_5 & -k_3 \\ -k_2 & k_3 + k_4 + k_5 \end{pmatrix} = a_0 \hat{I} + a_1 \hat{\sigma}_x + a_2 \hat{\sigma}_y + a_3 \hat{\sigma}_z$$

where  $\hat{\sigma}_x$ ,  $\hat{\sigma}_y$ , and  $\hat{\sigma}_z$  are standard Pauli matrices and  $\hat{I}$  is a unit matrix. The coefficients are:

$$(22) \quad a_0 = \frac{1}{2}(k_2 + k_4 + 2k_5 + k_3)$$

$$(23) \quad a_1 = -\frac{1}{2}(k_2 + k_3)$$

$$(24) \quad a_2 = \frac{1}{2}(k_2 - k_3)$$

$$(25) \quad a_3 = \frac{1}{2}(k_2 - k_3 - k_4)$$

We rewrite the matrix in terms of a unit vector  $\vec{n}$  and a vector  $\hat{\sigma}$  of the Pauli matrices:

$$(26) \quad \hat{F} = a_0 \hat{I} + \alpha \hat{\sigma} \cdot \vec{n}$$

$$(27) \quad \vec{n} = \frac{1}{2}(a_1, ia_2, a_3)$$

$$(28) \quad \alpha = \sqrt{a_1^2 + a_3^2 - a_2^2} = \frac{1}{2}\sqrt{4k_2k_3 + (k_2 - k_3 - k_4)^2} > 0$$

Using identities of Pauli matrices we have:

$$(29) \quad e^{\alpha H \hat{\sigma} \cdot \vec{n}} = \cosh(\alpha H) \hat{I} + \sinh(\alpha H) \hat{\sigma} \cdot \vec{n}$$

The kinetic equation can be written in terms of:

$$(30) \quad \begin{pmatrix} B \\ I \end{pmatrix} = e^{-\hat{F}H} \begin{pmatrix} \tilde{B} \\ \tilde{I} \end{pmatrix}$$

so that

$$(31) \quad \frac{d}{dH} \begin{pmatrix} \tilde{B} \\ \tilde{I} \end{pmatrix} = e^{\hat{F}H} \begin{pmatrix} k_1 e^{-k_1 H} \\ 0 \end{pmatrix}$$

Using the identity above for the exponent we get:

$$(32) \quad e^{\hat{F}H} = e^{a_0 H} \hat{I} \left[ \cosh(\alpha H) \hat{I} + \sinh(\alpha H) (\hat{F} - a_0 \hat{I}) \frac{1}{\alpha} \right]$$

$$(33) \quad e^{\hat{F}H} \begin{pmatrix} k_1 e^{-k_1 H} \\ 0 \end{pmatrix} = \left[ e^{a_0 H} \cosh(\alpha H) \hat{I} + e^{a_0 H} \sinh(\alpha H) \frac{1}{\alpha} \begin{pmatrix} a_3 & a_1 + a_2 \\ a_1 - a_2 & -a_3 \end{pmatrix} \right] \begin{pmatrix} k_1 e^{-k_1 H} \\ 0 \end{pmatrix}$$

Hence the kinetic equation becomes:

$$(34) \quad \frac{d}{dH} \begin{pmatrix} \tilde{B} \\ \tilde{I} \end{pmatrix} = \begin{pmatrix} e^{a_0 H} \cosh(\alpha H) k_1 e^{-k_1 H} + \frac{1}{\alpha} e^{a_0 H} \sinh(\alpha H) a_3 k_1 e^{-k_1 H} \\ \frac{1}{\alpha} e^{a_0 H} \sinh(\alpha H) (a_1 - a_2) k_1 e^{-k_1 H} \end{pmatrix}$$

After a straightforward integration and transforming back to B and N variables we obtain

$$(35) \quad \begin{pmatrix} B \\ I \end{pmatrix} = e^{-\hat{F}H} \begin{pmatrix} \tilde{B} \\ \tilde{I} \end{pmatrix} = e^{-a_0 H} \left[ \cosh(\alpha H) \hat{I} - \frac{\sinh(\alpha H)}{\alpha} \begin{pmatrix} a_3 & a_1 + a_2 \\ a_1 - a_2 & -a_3 \end{pmatrix} \right] \begin{pmatrix} \tilde{B} \\ \tilde{I} \end{pmatrix}$$

so that finally

$$(36) \quad B = \frac{1}{2} k_1 \left\{ \frac{e^{-k_1 H} - e^{-a_0 H - \alpha H}}{a_0 - k_1 + \alpha} \left( 1 + \frac{a_3}{\alpha} \right) + \frac{e^{-k_1 H} - e^{-a_0 H + \alpha H}}{a_0 - k_1 - \alpha} \left( 1 - \frac{a_3}{\alpha} \right) \right\}$$

$$(37) \quad I = \frac{1}{2} k_1 \frac{a_1 - a_2}{\alpha} \left\{ \frac{e^{-k_1 H} - e^{-a_0 H - \alpha H}}{a_0 - k_1 + \alpha} - \frac{e^{-k_1 H} - e^{-a_0 H + \alpha H}}{a_0 - k_1 - \alpha} \right\}$$

The kinetic equations for the polymer content  $P=B+I+R$  are identical to those of the model Eq. (1) so that we can use the solution for  $P$  and  $D$  of that model, and for the red phase:

$$(38) \quad R = P - B - I$$
